# Supplementary figures and images for: High Expression of PTGR1 Promotes NSCLC Cell Growth via Positive Regulation of Cyclin-Dependent Protein Kinase Complex
Source: Hindawi journal article supplement (doi:10.1155/2016/5230642), 2016-01-01

# PTGR1

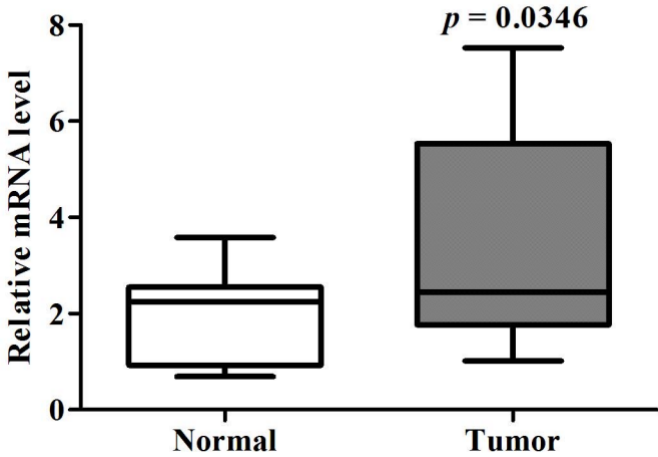

Supplement: f1 [file 5230642.f1.pdf]
